# Supplementary material for: Facile synthesis and optical properties of pure and Ni2+, Co2+, Bi3+, Sb3+substituted Cu3SnS4
Source: Royal Society of Chemistry journal article supplement (doi:10.1039/c4ra17125j), 2015-01-01
Supplement: c4ra17125j1.pdf [file c4ra17125j1.pdf]

Facile synthesis and optical properties of pure and Ni<sup>2+</sup>, Co<sup>2+</sup>, Bi<sup>3+</sup>, Sb<sup>3+</sup> substituted  
Cu<sub>3</sub>SnS<sub>4</sub>.

Meenakshi Gusain, Pooja Rawat and Rajamani Nagarajan\*

Materials Chemistry Group, Department of Chemistry, University of Delhi

Delhi 110007 INDIA

Essential Supporting Information (ESI†)

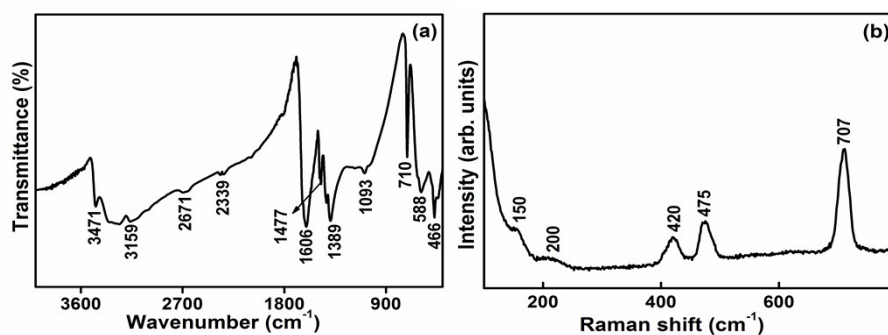

Fig. S1 (a) FT-IR and (b) Raman spectrum of [Cu(tu)<sub>3</sub>]Cl.

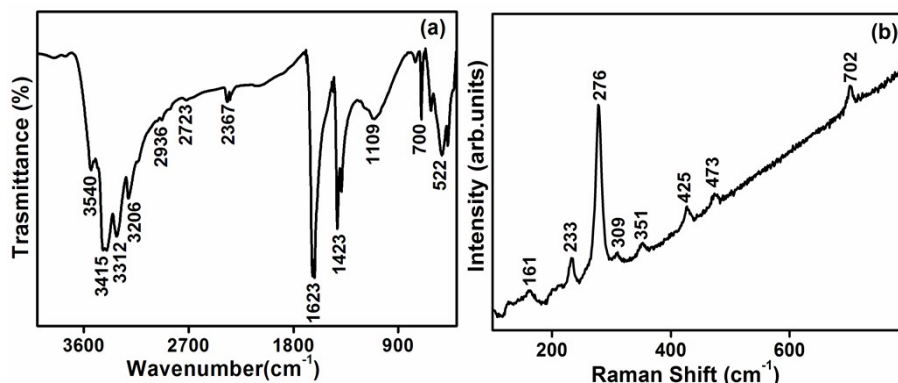

Fig. S2 (a) FT-IR and (b) Raman spectrum of [Sn(tu)Cl<sub>2</sub>].

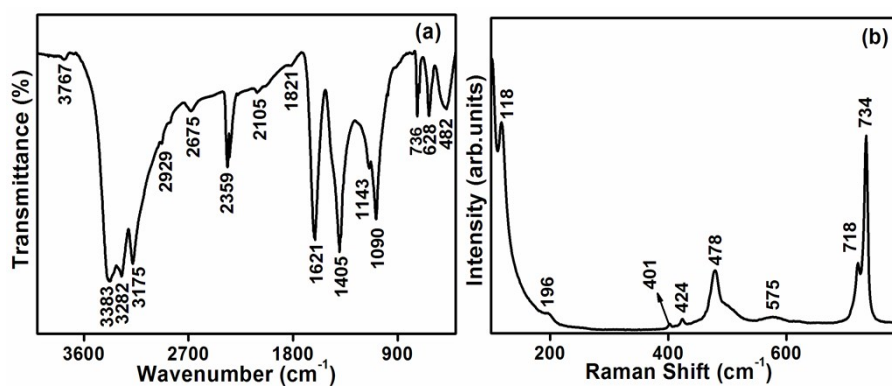

**Fig. S3** (a) FT-IR and (b) Raman spectrum of  $[\text{Ni}(\text{tu})_4]\text{SO}_4$ .

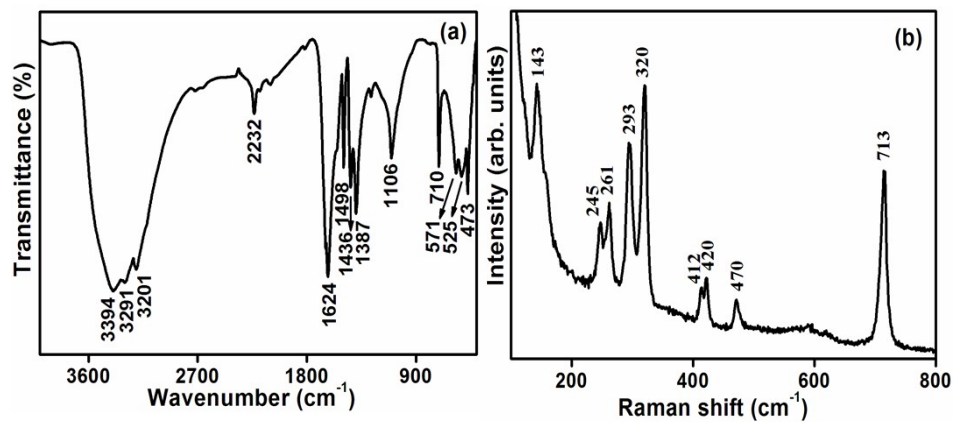

**Fig. S4** (a) FT-IR and (b) Raman spectrum of  $[\text{Co}(\text{tu})_2]\text{Cl}_2$ .

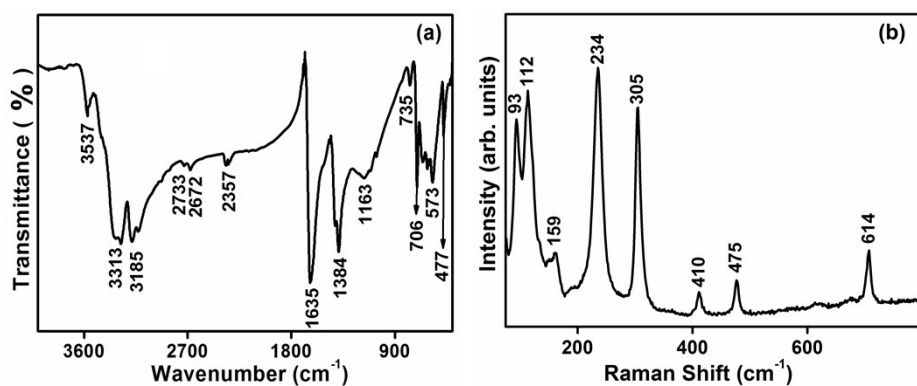

**Fig. S5** (a) FT-IR and (b) Raman spectrum of  $[\text{Sb}(\text{tu})_2]\text{Cl}_3$ .

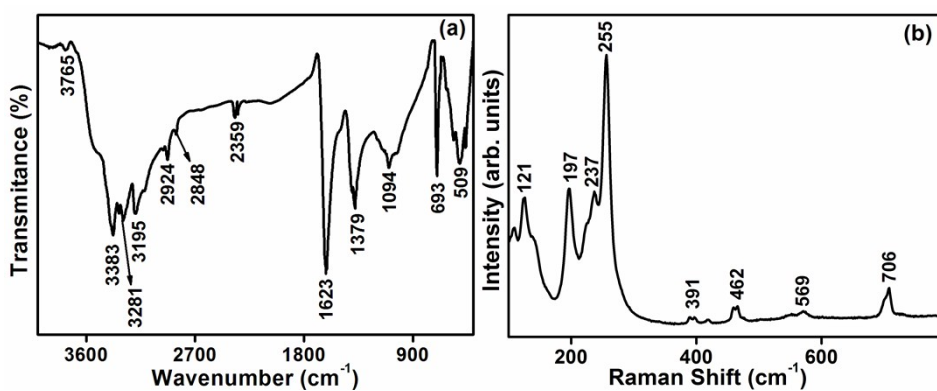

**Fig. S6** (a) FT-IR and (b) Raman spectrum of  $[\text{Bi}_3(\text{tu})_3]\text{Cl}_3$ .

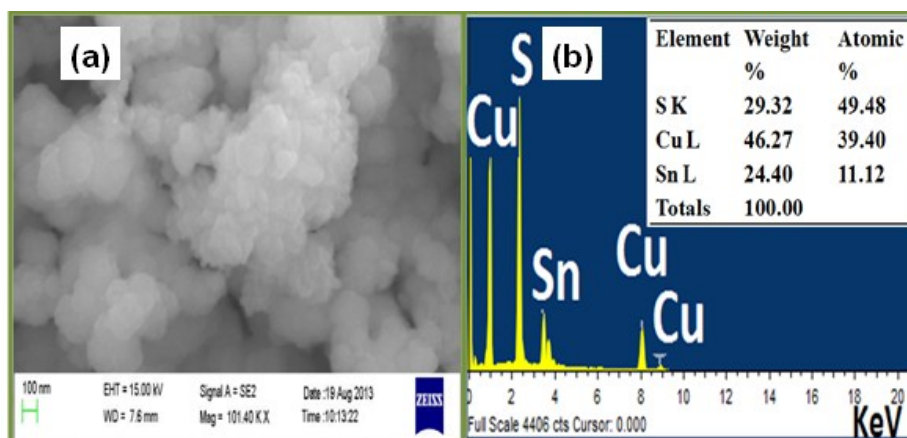

**Fig. S7** (a) SEM image and (b) EDX spectrum of  $\text{Cu}_3\text{SnS}_4$ .

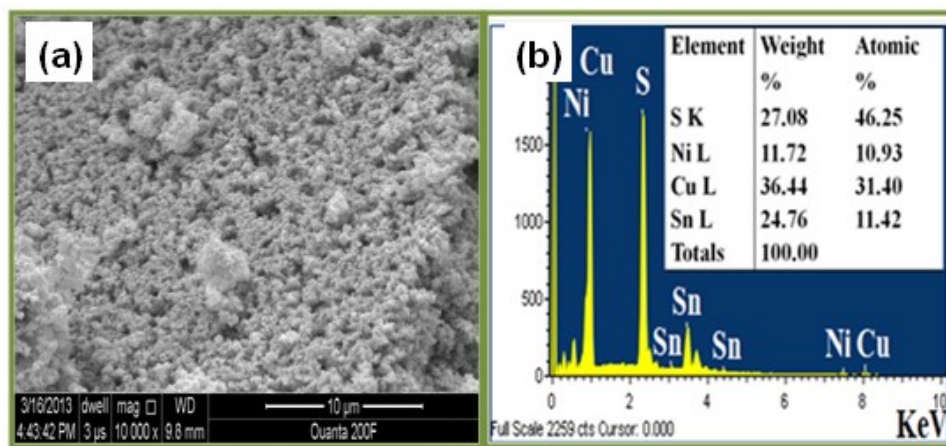

**Fig. S8** (a) SEM image and (b) EDX spectrum of product from the attempts to substitute nickel in  $\text{Cu}_3\text{SnS}_4$ .

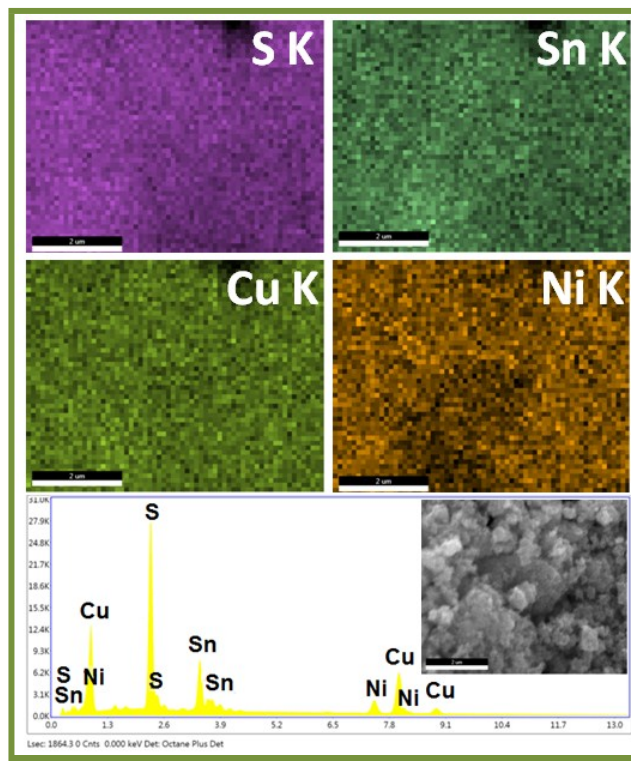

**Fig. S9** EDX spectrum and elemental mapping results of  $\text{Cu}_2\text{NiSnS}_4$ .

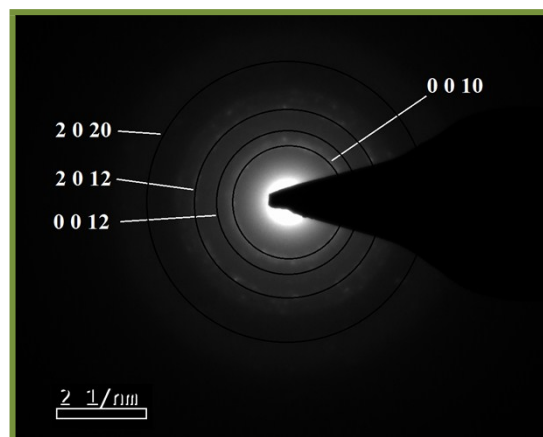

**Fig. S10** SAED pattern of  $\text{Cu}_2\text{NiSnS}_4$ .

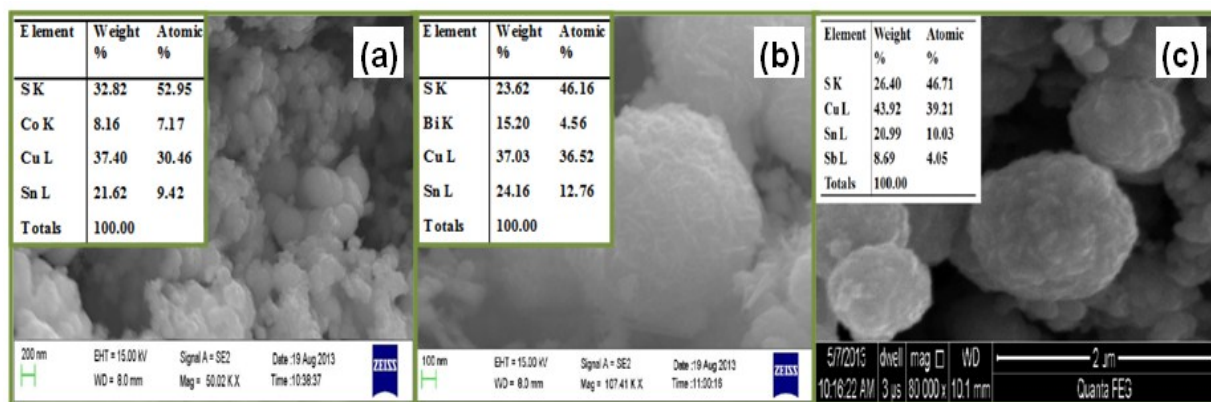

**Fig. S11** SEM images with EDX analysis of (a) cobalt (b) bismuth and (c) antimony substituted  $\text{Cu}_3\text{SnS}_4$  samples.
